# Supplementary material
Source: publisher figshare collection journal article supplement (https://acs.figshare.com/ndownloader/files/3588675)
Supplement: Supplementary file 1 [file 3588675]

## **Supporting Information for Energy and Fuels**

### **Partitioning of Crude Oil Acidic Compounds into Subfractions by Extrography and Identification of Isoprenoidyl Phenols and Tocopherols**

Yahe Zhang,<sup>†</sup> Quan Shi,<sup>\*†</sup> Aiqun Li<sup>†</sup>, Keng H. Chung,<sup>‡</sup> Suoqi Zhao,<sup>†</sup> and Chunming Xu<sup>\*†</sup>

<sup>†</sup>State Key Laboratory of Heavy Oil Processing, China University of Petroleum, Beijing 102249, China, and

<sup>‡</sup>Well Resources Inc., 3919-149A Street, Edmonton, Alberta, Canada T6R 1J8

\*Corresponding author contact information:

Email: [sq@cup.edu.cn](mailto:sq@cup.edu.cn) (Q.S.) [xcm@cup.edu.cn](mailto:xcm@cup.edu.cn) (C.X.)

FAX: 8610-69724721

#### **Table of Contents:**

Figure S-1 NIST library search result of Peak B in Figure 3.

Figure S-2 Mass error distribution in the full mass range.

Figure S-3 Average mass spectra during the elution time 14.64-42.58 minutes of Fraction #9.

Figure S-4 Pulsed flame photometric detector (PFPD) gas chromatogram for sulfur compounds of the crude oil.

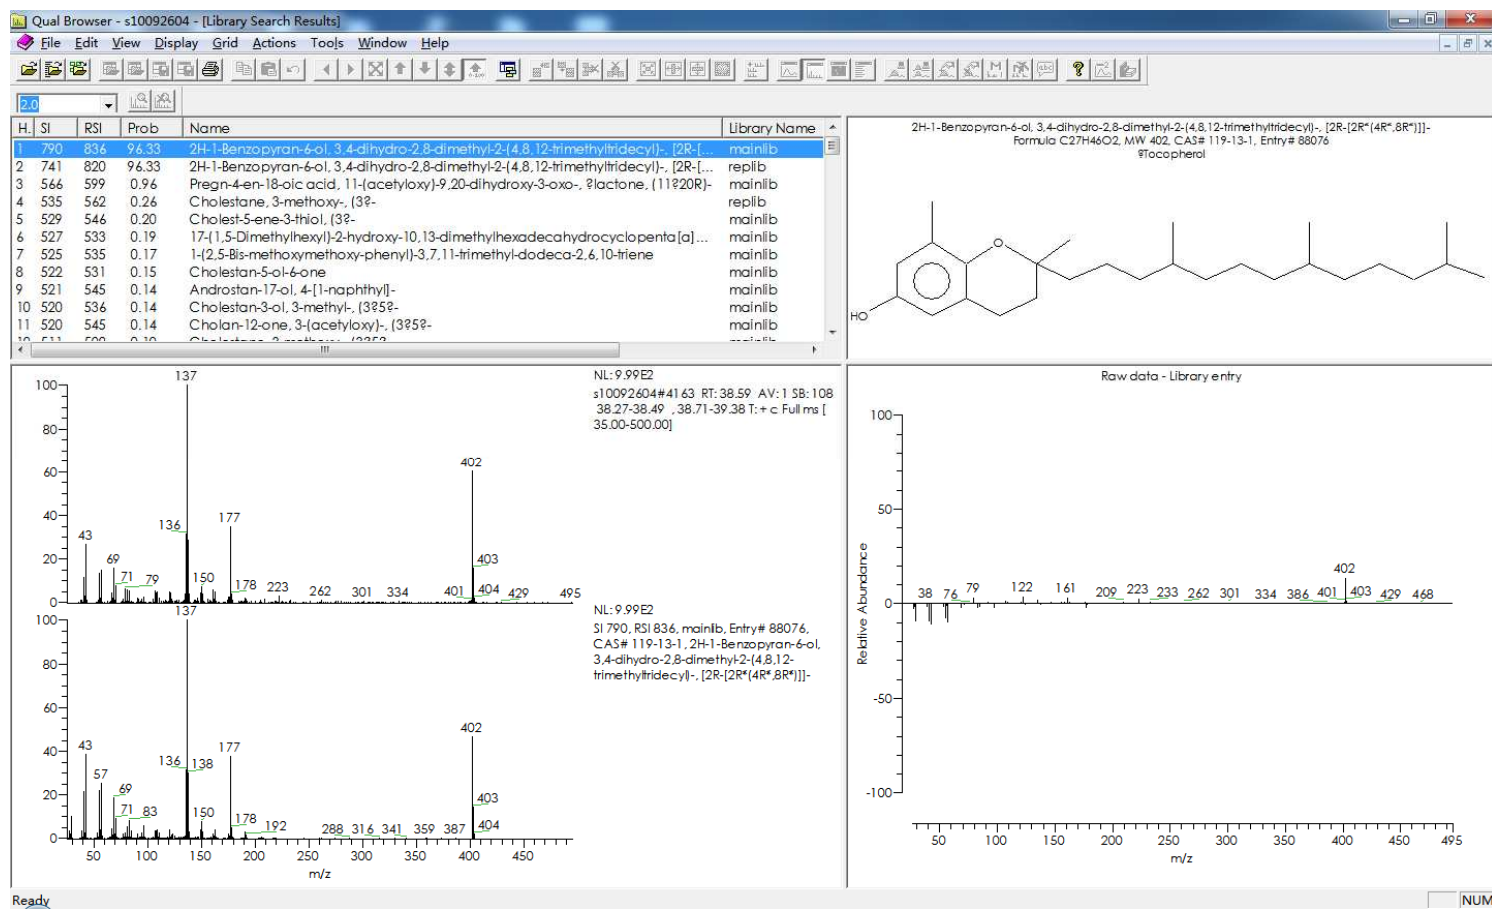

Figure S-1 NIST library search result of Peak B in Figure 3.

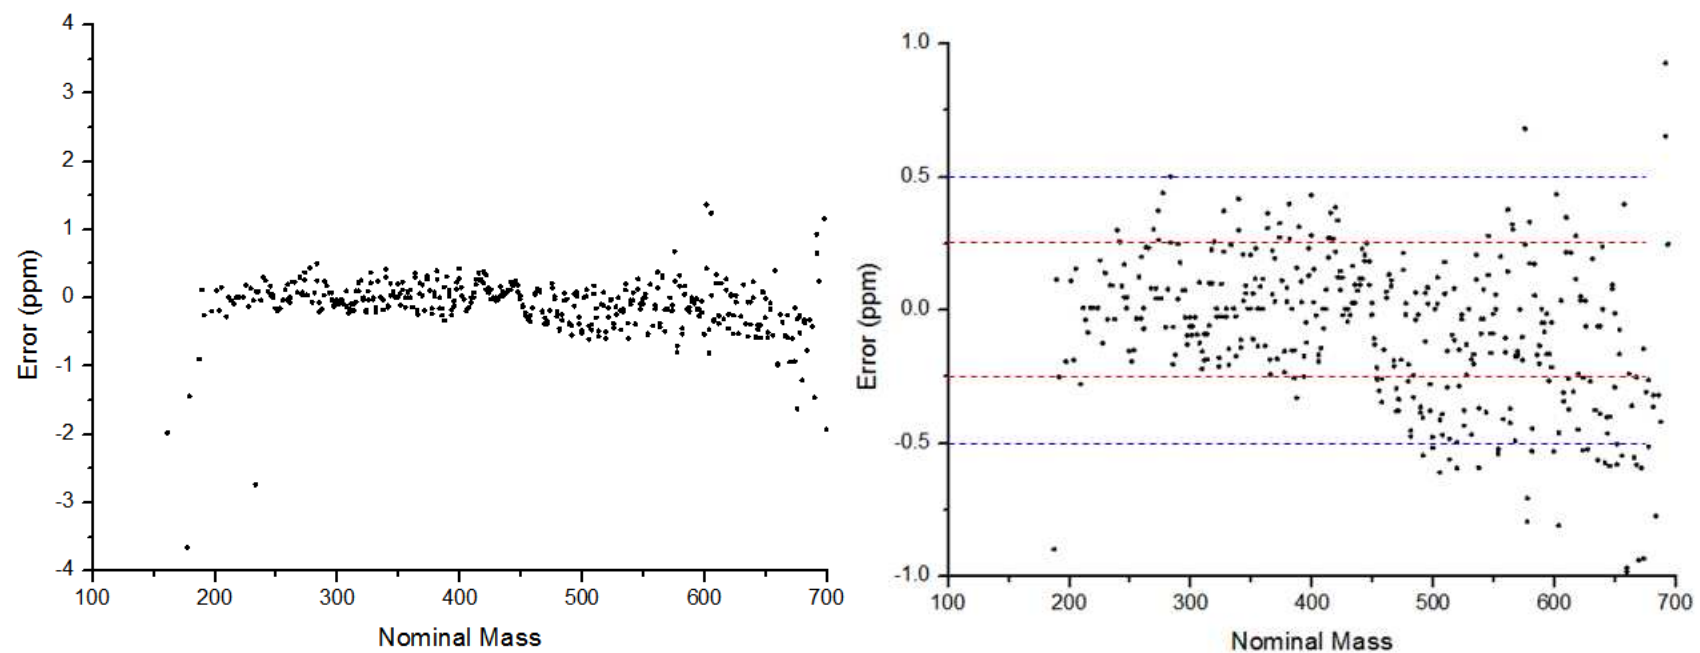

Figure S-2 Mass error distribution in the full mass range. The right-hand graph is the same as the left-hand one but with an expanded y-axis.

s10092702 #1041-4403 RT: 14.64-42.58 AV: 3363 SB: 704 6.67-8.40 , 47.27-51.38 NL: 6.80E4  
T: + c Full ms [ 35.00-500.00]

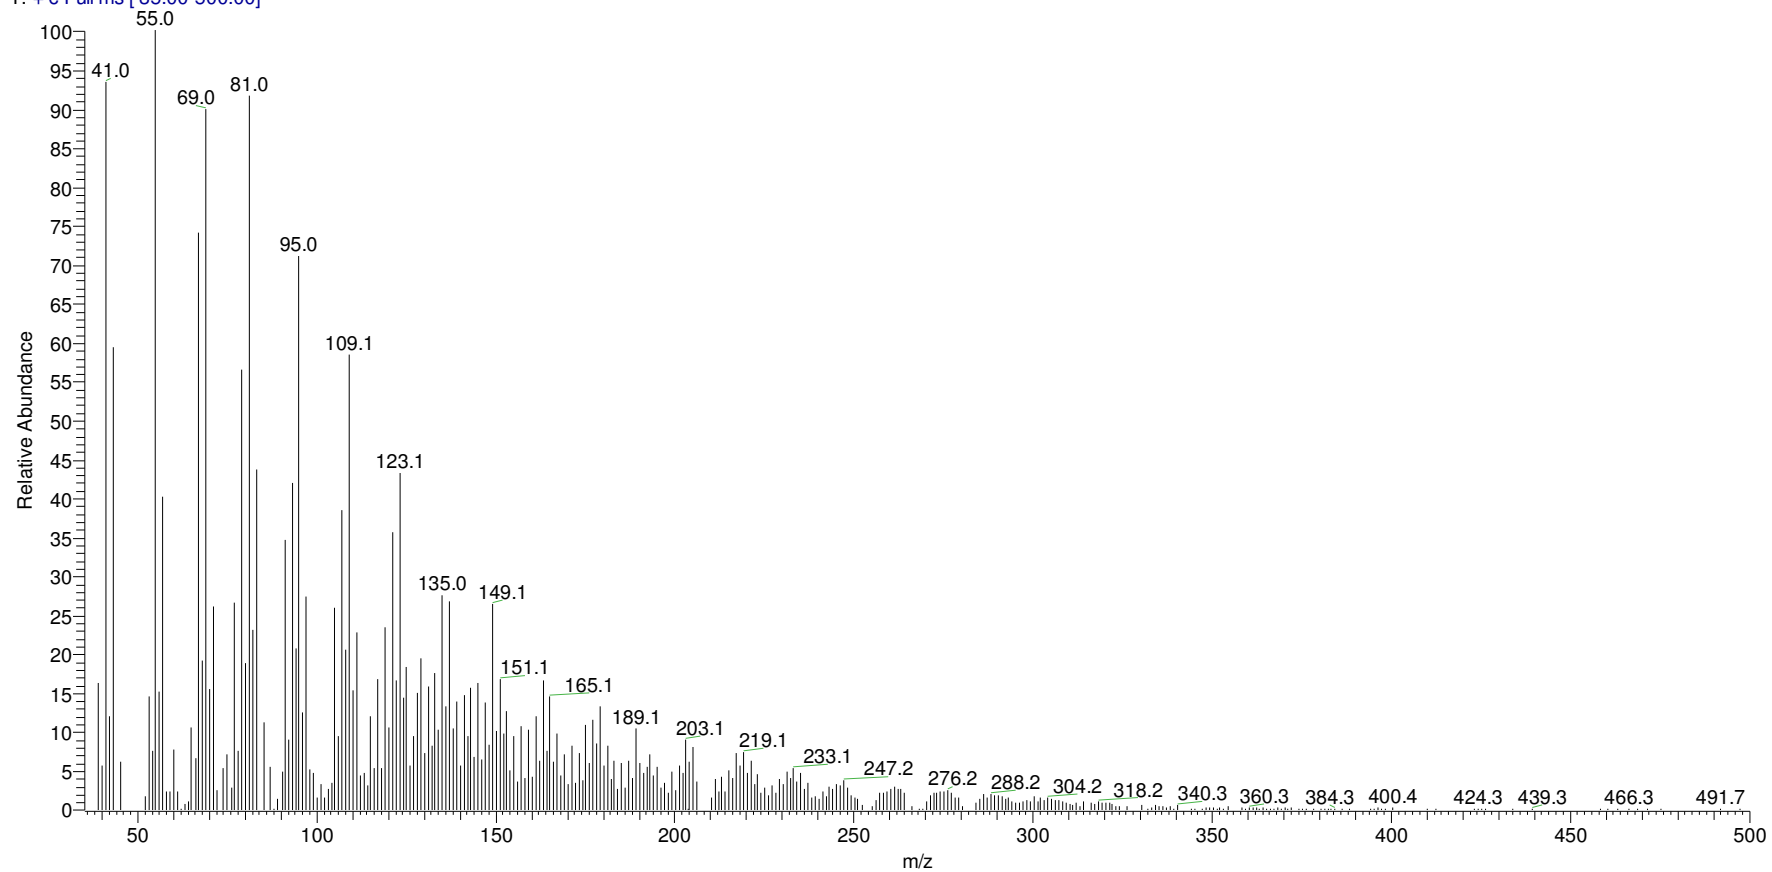

Figure S-3 Average mass spectra during the elution time 14.64-42.58 minutes of Fraction #9.

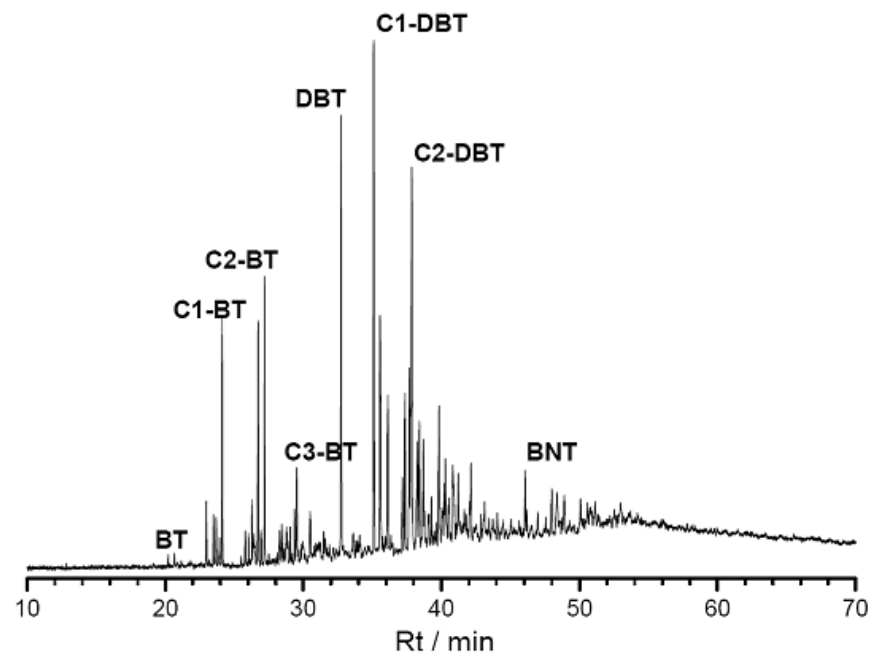

Figure S-4 Pulsed flame photometric detector (PFPD) gas chromatogram for sulfur compounds of the crude oil. BT: benzothiophene, DBT: dibenzothiophene, BNT: Benzonaphthothiophene. Programmed oven temperature: 50-1-50-5-300-30-300, Injector: 300°C split ratio: 50:1, Constant Flow: 1 mL min<sup>-1</sup>, Capillary column: HP-5 30m 0.25 mm 0.25 μm
